# Supplementary figures and images for: Effect of Hydrogen Cyanamide on Bud Break, Fruit Yield and Quality of Highbush Blueberry in Greenhouse Production
Source: MDPI journal article supplement (doi:10.3390/agriculture11050439), 2021-05-12

**Figure S1.** The effect of HC application on the fruit yield of 'M7' (A) and 'Brigitta' (B) in 2017.

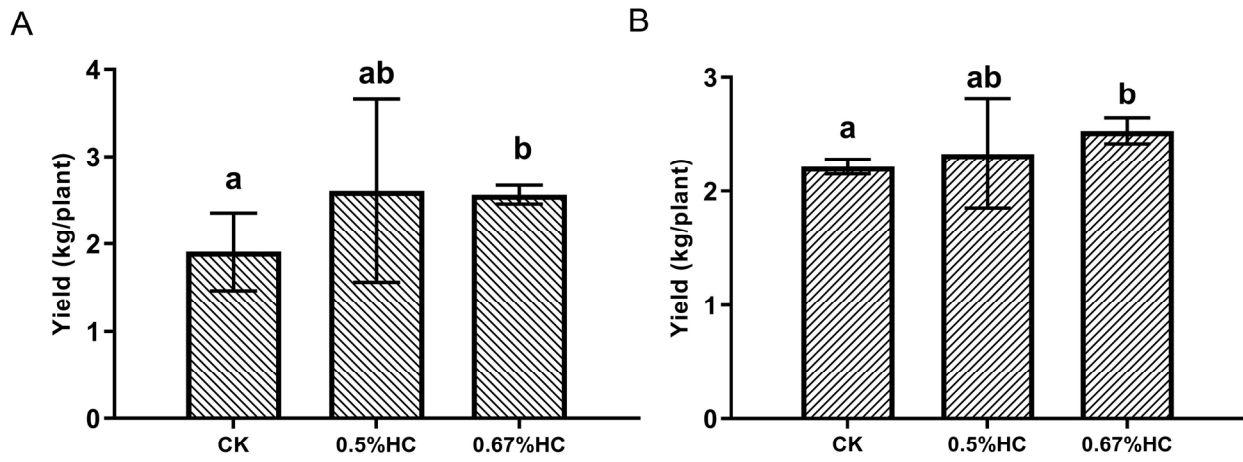

Supplement: s1 [file s1]
